# Supplementary material for: Zingiber officinale Root Capsule Extract Synergistically Enhance the Anti-Inflammatory Effects of Diclofenac Sodium in Experimental Acute Inflammation
Source: MDPI journal article supplement (doi:10.3390/ijms25031781), 2024-02-01
Supplement: s1 [file s1]

**Table S1.** Serum values of pro-inflammatory cytokines by group.

| Group            | TNF- $\alpha$ , pg/mL  | IL-6, pg/mL            | IL-1 $\beta$ , pg/mL   |
|------------------|------------------------|------------------------|------------------------|
| C                | 36.1 [24.4 to 47.8]    | 86.6 [81.5 to 90.5]    | 117 [105.1 to 120.8]   |
| AI               | 147.1 [135.6 to 158.1] | 229.4 [210.8 to 261.1] | 266.2 [244.3 to 334.4] |
| AI-D             | 103.9 [99.9 to 107.6]  | 142.1 [127.5 to 156.8] | 178 [164.4 to 202.2]   |
| AI-GRCE100       | 124.1 [116.5 to 135.1] | 208.2 [176 to 222]     | 216.8 [205 to 288.5]   |
| AI-GRCE200       | 114.5 [107.8 to 121.7] | 181 [169.2 to 184.4]   | 211.7 [189 to 237.7]   |
| AI-GRCE100-D     | 81.9 [77 to 88.3]      | 113 [109.1 to 120.6]   | 157.7 [151.8 to 162.5] |
| AI-GRCE200-D     | 52.9 [47.7 to 57.8]    | 89.6 [69.1 to 105.2]   | 133.2 [110.2 to 136.8] |
| *Stat. (p-value) | 50.2 (<0.0001)         | 48.6 (<0.0001)         | 44.7 (<0.0001)         |

Results are expressed as median [Q1 to Q3], where Q is the quartile.. \* Kruskal-Wallis test. Abbreviations: C—control; AI—Acute inflammation; D—Diclofenac; GRCE—Ginger root capsule extract.

**Table S2.** Serum values of  $\beta$ -Nerve Growth Factor ( $\beta$ -NGF) and Prostaglandin-endoperoxide synthase 2 (COX-2) by group.

| Group            | $\beta$ -NGF, pg/mL    | COX-2, pg/mL           |
|------------------|------------------------|------------------------|
| C                | 130.2 [129.2 to 131.8] | 13.8 [8.8 to 18.1]     |
| AI               | 133.9 [133.5 to 134.8] | 124.8 [108.8 to 135.3] |
| AI-D             | 132.8 [131.3 to 133.3] | 74.8 [65.8 to 78.5]    |
| AI-GRCE100       | 132.7 [131.6 to 134.6] | 112.8 [100.9 to 123.1] |
| AI-GRCE200       | 132.0 [131.1 to 133.2] | 82.8 [79.3 to 89.3]    |
| AI-GRCE100-D     | 131.1 [130.5 to 131.8] | 38.4 [36.8 to 47.8]    |
| AI-GRCE200-D     | 130.6 [129.5 to 131.7] | 17.8 [15.3 to 23.8]    |
| *Stat. (p-value) | 19.6 (0.0033)          | 49.6 (<0.0001)         |

Results are expressed as median [Q1 to Q3], where Q is the quartile. \* Kruskal-Wallis test. Abbreviations: C—control; AI—Acute inflammation; D—Diclofenac; GRCE—Ginger root capsule extract

**Table S3.** Tissue values of pro-inflammatory cytokines by group.

| Group            | TNF- $\alpha$ , pg/mL  | IL-6, pg/mL            | IL-1 $\beta$ , pg/mL   |
|------------------|------------------------|------------------------|------------------------|
| C                | 88.5 [82.1 to 94.1]    | 93.5 [88.9 to 123.1]   | 204.3 [163.9 to 252.9] |
| AI               | 445.7 [378.7 to 570.1] | 458.7 [292 to 492.4]   | 592.6 [453.2 to 661.2] |
| AI-D             | 259.7 [188.9 to 313.7] | 154.7 [126.6 to 181]   | 427.2 [323.5 to 452.7] |
| AI-GRCE100       | 308.9 [237.8 to 390.6] | 227 [162.1 to 291.1]   | 512.7 [434 to 562.9]   |
| AI-GRCE200       | 255.3 [220.3 to 280.4] | 185.2 [129.7 to 269.8] | 427.9 [322.1 to 577.4] |
| AI-GRCE100-D     | 185.6 [162.4 to 194.7] | 133.1 [118.9 to 149.8] | 316.4 [306 to 448]     |
| AI-GRCE200-D     | 114.9 [110.7 to 126.7] | 112.7 [100.3 to 122.8] | 234.6 [183.6 to 311.9] |
| *Stat. (p-value) | 43.9 (<0.0001)         | 33.7 (<0.0001)         | 29.5 (<0.0001)         |

Results are expressed as median [Q1 to Q3], where Q is the quartile. \* Kruskal-Wallis test. Abbreviations: C—control; AI—Acute inflammation; D—Diclofenac; GRCE—Ginger root capsule extract.

**Table S4.** Tissue values of  $\beta$ -Nerve Growth Factor ( $\beta$ -NGF) and Prostaglandin-endoperoxide synthase 2 (COX-2) by group.

| Group            | $\beta$ -NGF, pg/mL    | COX-2, pg/mL              |
|------------------|------------------------|---------------------------|
| C                | 147.2 [144 to 176.4]   | 380.8 [186.4 to 408.8]    |
| AI               | 480.4 [372 to 585.1]   | 2055.2 [1606.6 to 2605.5] |
| AI-D             | 442 [345.6 to 487.4]   | 1225.6 [846.6 to 1384.7]  |
| AI-GRCE100       | 470.7 [354.7 to 503.6] | 1813.4 [1285.6 to 2146.2] |
| AI-GRCE200       | 444.1 [336.7 to 532.7] | 1331.6 [1178.4 to 1559.3] |
| AI-GRCE100-D     | 415 [342.5 to 523.7]   | 909.6 [785.6 to 1032.3]   |
| AI-GRCE200-D     | 399.7 [268.2 to 527.7] | 691.2 [549.5 to 785.3]    |
| *Stat. (p-value) | 8.9 (0.1797)           | 44.6 (<0.0001)            |

Results are expressed as median [Q1 to Q3], where Q is the quartile. \* Kruskal-Wallis test. Abbreviations: C—control; AI—Acute inflammation; D—Diclofenac; GRCE—Ginger root capsule extract
